# Supplementary material
Source: publisher figshare collection journal article supplement (https://aacr.figshare.com/articles/dataset/_/22479893)
Supplement: Supplementary file 1 [file 39931400]

**Supplementary Table 1. Baseline characteristics of MM patients at diagnosis**

| Characteristics               | All patients (n = 157) |
|-------------------------------|------------------------|
| Age, years, median (range)    | 64 (37-92)             |
| Male, n (%)                   | 88 (56.1)              |
| ECOG PS, n (%)                |                        |
| 0-1                           | 112 (71.3)             |
| ≥2                            | 45 (22.9)              |
| BM Plasma cell, % (range)     | 43.8 (10.2-96.9)       |
| FLC ratio, median (range)     | 3.81 (<0.01-20637.78)  |
| Kappa FLC (mg/L)              | 72.25 (3.65-31886.00)  |
| Lambda FLC (mg/L)             | 16.30 (0.90-35758.00)  |
| Type, n (%)                   |                        |
| IgG kappa/lambda              | 51 (32.5)/36 (22.9)    |
| IgA kappa/lambda              | 16 (10.2)/14 (8.9)     |
| IgD kappa/lambda              | 2 (1.3)/5 (3.2)        |
| Kappa/lambda only             | 23 (14.6)/10 (6.4)     |
| High-risk cytogenetics, n (%) |                        |
| t(4;14)                       | 4 (2.6)                |
| t(14;16)                      | 5 (3.2)                |
| del17p                        | 23 (14.7)              |
| amp1q21                       | 36 (23.1)              |
| N/A                           | 1 (0.6)                |
| ISS staging                   |                        |
| I                             | 51 (32.5)              |
| II                            | 47 (29.9)              |
| III                           | 59 (37.6)              |
| R-ISS staging                 |                        |
| I                             | 40 (25.6)              |
| II                            | 89 (57.1)              |
| III                           | 27 (17.3)              |
| N/A                           | 1 (0.6)                |
| First-line treatment          |                        |
| VTD                           | 64 (40.8)              |
| VMP                           | 58 (36.9)              |
| VD                            | 5 (3.2)                |
| TD                            | 11 (7.0)               |
| RD                            | 12 (7.6)               |
| Others                        | 7 (4.5)                |
| ASCT                          | 62 (39.5)              |
| CMV IgG (+), n (%)            | 156 (99.4)             |

ECOG, Eastern Cooperative Oncology Group; PS, performance status; BM, bone marrow; FLC, free light chain; ISS, International Staging System; R-ISS, Revised ISS; V, bortezomib; T, thalidomide; D, dexamethasone; M, melphalan; P, prednisolone, R, lenalidomide; ASCT, autologous stem cell transplantation; CMV, cytomegalovirus.

**Supplementary Table 2. FACS antibodies used in this study**

| Antibody                                    | Company          | Cat no.     |
|---------------------------------------------|------------------|-------------|
| FITC anti-human CD3                         | eBioscience      | 11-0038-42  |
| PE-CF594 anti-human CD14                    | BD Biosciences   | 562335      |
| PE-CF594 anti-human CD19                    | BD Biosciences   | 562294      |
| APC-H7 anti-human CD45                      | BD Biosciences   | 560178      |
| BV786 anti-human CD56                       | BD Biosciences   | 742662      |
| BV605 anti-human CD16                       | BD Biosciences   | 563172      |
| PE anti-human PD-1                          | Biolegend        | 329906      |
| BV711 anti-human TIM-3                      | Biolegend        | 345024      |
| BV650 anti-human LAG-3                      | Biolegend        | 369316      |
| PerCP-eF710 anti-human TIGIT                | eBioscience      | 46-9500-42  |
| BV786 anti-human CD226 (DNAM-1)             | BioLegend        | 338321      |
| PE-CF594 anti-human CD314 (NKG2D)           | BD Biosciences   | 562498      |
| PerCP-Cy5.5 anti-human CD38                 | BD Biosciences   | 551400      |
| BV421 anti-human CD138                      | BD Biosciences   | 562935      |
| FITC anti-human Galectin-9 Antibody         | Biolegend        | 348912      |
| PE anti-human CD159a (NKG2A)                | Miltenyi Biotech | 130-113-566 |
| BV650 anti-human CD335 (NKp46)              | BioLegend        | 331927      |
| BV421 anti-human CD337 (NKp30)              | BD Biosciences   | 563385      |
| FITC anti-human Galectin-9                  | Biolegend        | 348912      |
| APC anti-human HLA-ABC                      | BioRad           | MCA81       |
| PE anti-human HLA-E                         | Miltenyi         | 130-118-541 |
| PE-Cy7 anti-human CD155 (PVR)               | Biolegend        | 337613      |
| PE-Vio770 anti-human CD158e/k (KIR3DL1/DL2) | Miltenyi         | 130-116-180 |
| PE-Vio770 anti-human CD158b (KIR2DL2/DL3)   | Miltenyi         | 130-099-892 |
| PE-Vio770 anti-human CD158a (KIR2DL1)       | Miltenyi         | 130-120-447 |
| FITC anti-human FcεRI γ-subunit             | Merck Millipore  | FCABS400F   |
| APC anti-human NKG2C/CD159c                 | R&D systems      | FAB138A-100 |
| PE anti-human CD107a                        | BD Biosciences   | 555801      |
| Pe-Cy7 anti-human TNF                       | BD Biosciences   | 557647      |
| BV711 anti-human IFN-γ                      | BD Biosciences   | 564039      |
| PE anti-human PLZF                          | BD Biosciences   | 564850      |
| Pe-Cy7 anti-human CD57                      | Biolegend        | 359624      |
| BV421 anti-human Bcl-2                      | Biolegend        | 658709      |
